# Supplementary material
Source: Springer Nature journal article supplement (https://www.springermedizin.de/resource/supplementary/13058_2008_2121_MOESM3_ESM.pdf/9700680)
Supplement: MOESM3 [file 9700680]

**Additional Data File 3 - 785 genes****Comparison among Non-neoplastic cells, pure DCIS, *in situ* component of DCIS-IDC**

| <b>GeneID</b> | <b>Symbol</b> | <b>Description</b>                                                                                                                    |
|---------------|---------------|---------------------------------------------------------------------------------------------------------------------------------------|
| 9337          | CNOT8         | CCR4-NOT transcription complex, subunit 8                                                                                             |
| 51393         | TRPV2         | transient receptor potential cation channel, subfamily V, member 2                                                                    |
| 55893         | ZNF395        | zinc finger protein 395                                                                                                               |
| 23048         | FNBP1         | formin binding protein 1                                                                                                              |
| 23048         | FNBP1         | formin binding protein 1                                                                                                              |
| 55777         | MBD5          | methyl-CpG binding domain protein 5                                                                                                   |
| 23451         | SF3B1         | splicing factor 3b, subunit 1, 155kDa                                                                                                 |
| 55256         | ADI1          | acireductone dioxygenase 1                                                                                                            |
| 79157         | ET            | hypothetical protein ET                                                                                                               |
| 4784          | NFIX          | nuclear factor I/X (CCAAT-binding transcription factor)                                                                               |
| 114112        | TXNRD3        | thioredoxin reductase 3                                                                                                               |
| 9055          | PRC1          | protein regulator of cytokinesis 1                                                                                                    |
| 9325          | TRIP4         | thyroid hormone receptor interactor 4                                                                                                 |
| 6638          | SNRPN         | small nuclear ribonucleoprotein polypeptide N                                                                                         |
| 6249          | RSN           | restin (Reed-Steinberg cell-expressed intermediate filament-associated protein)                                                       |
| 5630          | PRPH          | peripherin                                                                                                                            |
| 5046          | PCSK6         | proprotein convertase subtilisin/kexin type 6                                                                                         |
| 57455         | REXO1         | REX1, RNA exonuclease 1 homolog (S. cerevisiae)                                                                                       |
| 54432         | YIPF1         | Yip1 domain family, member 1                                                                                                          |
| 84135         | UTP15         | UTP15, U3 small nucleolar ribonucleoprotein, homolog (S. cerevisiae)                                                                  |
| 3030          | HADHA         | hydroxyacyl-Coenzyme A dehydrogenase/3-ketoacyl-Coenzyme A thiolase/enoyl-Coenzyme A hydratase (trifunctional protein), alpha subunit |
| 9563          | H6PD          | hexose-6-phosphate dehydrogenase (glucose 1-dehydrogenase)                                                                            |
| 9989          | PPP4R1        | protein phosphatase 4, regulatory subunit 1                                                                                           |
| 154807        | VKORC1L1      | vitamin K epoxide reductase complex, subunit 1-like 1                                                                                 |
| 54876         | C4orf30       | chromosome 4 open reading frame 30                                                                                                    |
| 5603          | MAPK13        | mitogen-activated protein kinase 13                                                                                                   |
| 3710          | ITPR3         | inositol 1,4,5-triphosphate receptor, type 3                                                                                          |
| 10213         | PSMD14        | proteasome (prosome, macropain) 26S subunit, non-ATPase, 14                                                                           |
| 51430         | C1orf9        | chromosome 1 open reading frame 9                                                                                                     |
| 7884          | SLBP          | stem-loop (histone) binding protein                                                                                                   |
| 57231         | SNX14         | sorting nexin 14                                                                                                                      |
| 7006          | TEC           | tec protein tyrosine kinase                                                                                                           |
| 64645         | HIAT1         | hippocampus abundant transcript 1                                                                                                     |

|        |          |                                                                                   |
|--------|----------|-----------------------------------------------------------------------------------|
| 9920   | KBTBD11  | kelch repeat and BTB (POZ) domain containing 11                                   |
| 9650   | MTFR1    | mitochondrial fission regulator 1                                                 |
| 57535  | KIAA1324 | KIAA1324                                                                          |
| 34     | ACADM    | acyl-Coenzyme A dehydrogenase, C-4 to C-12 straight chain                         |
| 84769  | FKSG24   | hypothetical protein MGC12972                                                     |
| 2870   | GRK6     | G protein-coupled receptor kinase 6                                               |
| 2768   | GNA12    | guanine nucleotide binding protein (G protein) alpha 12                           |
| 10947  | AP3M2    | adaptor-related protein complex 3, mu 2 subunit                                   |
| 50848  | F11R     | F11 receptor                                                                      |
| 6941   | TCF19    | transcription factor 19 (SC1)                                                     |
| 6770   | STAR     | steroidogenic acute regulator                                                     |
| 1439   | CSF2RB   | colony stimulating factor 2 receptor, beta, low-affinity (granulocyte-macrophage) |
| 3836   | KPNA1    | karyopherin alpha 1 (importin alpha 5)                                            |
| 159    | ADSS     | adenylosuccinate synthase                                                         |
| 10269  | ZMPSTE24 | zinc metallopeptidase (STE24 homolog, yeast)                                      |
| 2889   | RAPGEF1  | Rap guanine nucleotide exchange factor (GEF) 1                                    |
| 9950   | GOLGA5   | golgi autoantigen, golgin subfamily a, 5                                          |
| 1594   | CYP27B1  | cytochrome P450, family 27, subfamily B, polypeptide 1                            |
| 84823  | LMNB2    | lamin B2                                                                          |
| 26128  | KIAA1279 | KIAA1279                                                                          |
| 7572   | ZNF24    | zinc finger protein 24                                                            |
| 9453   | GGPS1    | geranylgeranyl diphosphate synthase 1                                             |
| 4312   | MMP1     | matrix metallopeptidase 1 (interstitial collagenase)                              |
| 9706   | ULK2     | unc-51-like kinase 2 (C. elegans)                                                 |
| 400673 | VMAC     | vimentin-type IF-associated coiled-coil protein                                   |
| 5571   | PRKAG1   | protein kinase, AMP-activated, gamma 1 non-catalytic subunit                      |
| 51582  | AZIN1    | antizyme inhibitor 1                                                              |
| 57700  | KIAA1600 | KIAA1600                                                                          |
| 56910  | STARD7   | START domain containing 7                                                         |
| 10964  | IFI44L   | interferon-induced protein 44-like                                                |
| 23228  | PLCL2    | phospholipase C-like 2                                                            |
| 8888   | MCM3AP   | MCM3 minichromosome maintenance deficient 3 (S. cerevisiae) associated protein    |
| 8554   | PIAS1    | protein inhibitor of activated STAT, 1                                            |
| 23317  | DNAJC13  | DnaJ (Hsp40) homolog, subfamily C, member 13                                      |
| 29123  | ANKRD11  | ankyrin repeat domain 11                                                          |
| 84502  | JPH4     | junctophilin 4                                                                    |

|        |          |                                                                                 |
|--------|----------|---------------------------------------------------------------------------------|
| 7347   | UCHL3    | ubiquitin carboxyl-terminal esterase L3 (ubiquitin thiolesterase)               |
| 10848  | PPP1R13L | protein phosphatase 1, regulatory (inhibitor) subunit 13 like                   |
| 7508   | XPC      | xeroderma pigmentosum, complementation group C                                  |
| 51673  | CGI-38   | brain specific protein                                                          |
| 199745 | THAP8    | THAP domain containing 8                                                        |
| 26585  | GREM1    | gremlin 1, cysteine knot superfamily, homolog (Xenopus laevis)                  |
| 8741   | TNFSF13  | tumor necrosis factor (ligand) superfamily, member 13                           |
| 815    | CAMK2A   | calcium/calmodulin-dependent protein kinase (CaM kinase) II alpha               |
| 84437  | KIAA1826 | KIAA1826                                                                        |
| 8496   | PPFIBP1  | PTPRF interacting protein, binding protein 1 (liprin beta 1)                    |
| 4791   | NFKB2    | nuclear factor of kappa light polypeptide gene enhancer in B-cells 2 (p49/p100) |
| 9354   | UBE4A    | ubiquitination factor E4A (UFD2 homolog, yeast)                                 |
| 23389  | THRAP2   | thyroid hormone receptor associated protein 2                                   |
| 55107  | TMEM16A  | transmembrane protein 16A                                                       |
| 5338   | PLD2     | phospholipase D2                                                                |
| 10891  | PPARGC1A | peroxisome proliferator-activated receptor gamma, coactivator 1 alpha           |
| 91419  | XRCC6BP1 | XRCC6 binding protein 1                                                         |
| 83604  | TMEM47   | transmembrane protein 47                                                        |
| 8862   | APLN     | apelin, AGTRL1 ligand                                                           |
| 55716  | LMBR1L   | limb region 1 homolog (mouse)-like                                              |
| 23127  | GLT25D2  | glycosyltransferase 25 domain containing 2                                      |
| 4801   | NFYB     | nuclear transcription factor Y, beta                                            |
| 1031   | CDKN2C   | cyclin-dependent kinase inhibitor 2C (p18, inhibits CDK4)                       |
| 5007   | OSBP     | oxysterol binding protein                                                       |
| 360    | AQP3     | aquaporin 3 (Gill blood group)                                                  |
| 22894  | KIAA1008 | KIAA1008                                                                        |
| 3964   | LGALS8   | lectin, galactoside-binding, soluble, 8 (galectin 8)                            |
| 4036   | LRP2     | low density lipoprotein-related protein 2                                       |
| 79145  | CHCHD7   | coiled-coil-helix-coiled-coil-helix domain containing 7                         |
| 10144  | FAM13A1  | family with sequence similarity 13, member A1                                   |
| 90410  | IFT20    | intraflagellar transport 20 homolog (Chlamydomonas)                             |
| 8476   | CDC42BPA | CDC42 binding protein kinase alpha (DMPK-like)                                  |
| 26287  | ANKRD2   | ankyrin repeat domain 2 (stretch responsive muscle)                             |

|       |          |                                                                                                   |
|-------|----------|---------------------------------------------------------------------------------------------------|
| 7321  | UBE2D1   | ubiquitin-conjugating enzyme E2D 1 (UBC4/5 homolog, yeast)                                        |
| 7323  | UBE2D3   | ubiquitin-conjugating enzyme E2D 3 (UBC4/5 homolog, yeast)                                        |
| 7323  | UBE2D3   | ubiquitin-conjugating enzyme E2D 3 (UBC4/5 homolog, yeast)                                        |
| 6662  | SOX9     | SRY (sex determining region Y)-box 9 (campomelic dysplasia, autosomal sex-reversal)               |
| 27238 | GPKOW    | G patch domain and KOW motifs                                                                     |
| 58472 | SQRDL    | sulfide quinone reductase-like (yeast)                                                            |
| 26000 | TBC1D10B | TBC1 domain family, member 10B                                                                    |
| 4218  | RAB8A    | RAB8A, member RAS oncogene family                                                                 |
| 26509 | FER1L3   | fer-1-like 3, myoferlin ( <i>C. elegans</i> )                                                     |
| 9079  | LDB2     | LIM domain binding 2                                                                              |
| 51187 | C15orf15 | chromosome 15 open reading frame 15 solute carrier family 39 (zinc transporter), member 7         |
| 7922  | SLC39A7  | dual specificity phosphatase 9                                                                    |
| 1852  | DUSP9    | CTP synthase II                                                                                   |
| 56474 | CTPS2    | adenylate cyclase 7                                                                               |
| 113   | ADCY7    | SEC14-like 1 ( <i>S. cerevisiae</i> )                                                             |
| 6397  | SEC14L1  | cystatin A (stefin A)                                                                             |
| 1475  | CSTA     | N-acetylglucosamine kinase                                                                        |
| 55577 | NAGK     | eukaryotic translation initiation factor 3, subunit 4 delta, 44kDa                                |
| 8666  | EIF3S4   | solute carrier family 20 (phosphate transporter), member 1                                        |
| 6574  | SLC20A1  | asparagine-linked glycosylation 8 homolog ( <i>S. cerevisiae</i> , alpha-1,3-glucosyltransferase) |
| 79053 | ALG8     | Sec23 homolog B ( <i>S. cerevisiae</i> )                                                          |
| 10483 | SEC23B   | microsomal glutathione S-transferase 3                                                            |
| 4259  | MGST3    | mitogen-activated protein kinase 8                                                                |
| 5599  | MAPK8    | programmed cell death 7                                                                           |
| 10081 | PDCD7    | protocadherin 1 (cadherin-like 1)                                                                 |
| 5097  | PCDH1    | TBC1 domain family, member 15                                                                     |
| 64786 | TBC1D15  | epidermal growth factor receptor pathway substrate 15                                             |
| 2060  | EPS15    | mesoderm induction early response 1                                                               |
| 57708 | MIER1    | homolog ( <i>Xenopus laevis</i> )                                                                 |
| 8452  | CUL3     | cullin 3                                                                                          |
| 25957 | C6orf111 | chromosome 6 open reading frame 111                                                               |
| 4817  | NIT1     | nitrilase 1                                                                                       |
| 93621 | MRFP1    | Mof4 family associated protein 1                                                                  |
| 51116 | MRPS2    | mitochondrial ribosomal protein S2                                                                |
| 4915  | NTRK2    | neurotrophic tyrosine kinase, receptor, type 2                                                    |
| 847   | CAT      | catalase                                                                                          |
| 2982  | GUCY1A3  | guanylate cyclase 1, soluble, alpha 3                                                             |
| 5997  | RGS2     | regulator of G-protein signalling 2, 24kDa                                                        |

|        |          |                                                                                         |
|--------|----------|-----------------------------------------------------------------------------------------|
| 10133  | OPTN     | optineurin                                                                              |
| 64375  | IKZF4    | IKAROS family zinc finger 4 (Eos)                                                       |
| 9246   | UBE2L6   | ubiquitin-conjugating enzyme E2L 6                                                      |
| 23150  | FRMD4B   | FERM domain containing 4B                                                               |
| 7257   | TSNAX    | translin-associated factor X                                                            |
| 7187   | TRAF3    | TNF receptor-associated factor 3                                                        |
| 9639   | ARHGEF10 | Rho guanine nucleotide exchange factor (GEF) 10                                         |
| 27069  | GHITM    | growth hormone inducible transmembrane protein                                          |
| 6286   | S100P    | S100 calcium binding protein P                                                          |
| 83986  | ITFG3    | integrin alpha FG-GAP repeat containing 3 gamma tubulin ring complex protein (76p gene) |
| 27229  | 76P      |                                                                                         |
| 120863 | DEPDC4   | DEP domain containing 4                                                                 |
| 80790  | CMIP     | c-Maf-inducing protein                                                                  |
| 56852  | RAD18    | RAD18 homolog ( <i>S. cerevisiae</i> )                                                  |
| 26354  | GNL3     | guanine nucleotide binding protein-like 3 (nucleolar)                                   |
| 6146   | RPL22    | ribosomal protein L22                                                                   |
| 3909   | LAMA3    | laminin, alpha 3                                                                        |
| 7920   | BAT5     | HLA-B associated transcript 5                                                           |
| 79573  | TTC13    | tetratricopeptide repeat domain 13                                                      |
| 1843   | DUSP1    | dual specificity phosphatase 1                                                          |
| 8829   | NRP1     | neuropilin 1                                                                            |
| 9518   | GDF15    | growth differentiation factor 15                                                        |
| 10557  | RPP38    | ribonuclease P/MRP 38kDa subunit                                                        |
| 9073   | CLDN8    | claudin 8                                                                               |
| 28512  | NKIRAS1  | NFKB inhibitor interacting Ras-like 1                                                   |
| 8609   | KLF7     | Kruppel-like factor 7 (ubiquitous)                                                      |
| 79084  | WDR77    | WD repeat domain 77                                                                     |
| 833    | CARS     | cysteinyl-tRNA synthetase                                                               |
| 58487  | ZF       | HCF-binding transcription factor Zhangfei                                               |
| 2824   | GPM6B    | glycoprotein M6B                                                                        |
| 5264   | PHYH     | phytanoyl-CoA 2-hydroxylase                                                             |
| 10418  | SPON1    | spondin 1, extracellular matrix protein                                                 |
| 56882  | CDC42SE1 | CDC42 small effector 1                                                                  |
| 644    | BLVRA    | biliverdin reductase A                                                                  |
| 11221  | DUSP10   | dual specificity phosphatase 10                                                         |
| 1731   | SEPT1    | septin 1                                                                                |
| 9424   | KCNK6    | potassium channel, subfamily K, member 6                                                |
| 5740   | PTGIS    | prostaglandin I2 (prostacyclin) synthase                                                |
| 7038   | TG       | thyroglobulin                                                                           |
| 827    | CAPN6    | calpain 6                                                                               |
| 3553   | IL1B     | interleukin 1, beta                                                                     |
| 150572 | SMYD1    | SET and MYND domain containing 1                                                        |
| 23348  | DOCK9    | dedicator of cytokinesis 9                                                              |
| 23288  | IQCE     | IQ motif containing E                                                                   |
| 60412  | EXOC4    | exocyst complex component 4                                                             |
| 57680  | CHD8     | chromodomain helicase DNA binding protein 8                                             |

|        |          |                                                                                   |
|--------|----------|-----------------------------------------------------------------------------------|
| 27248  | C2orf30  | chromosome 2 open reading frame 30                                                |
| 54987  | C1orf123 | chromosome 1 open reading frame 123                                               |
| 49855  | ZNF291   | zinc finger protein 291                                                           |
| 22978  | NT5C2    | 5'-nucleotidase, cytosolic II                                                     |
| 26224  | FBXL3    | F-box and leucine-rich repeat protein 3                                           |
| 27243  | CHMP2A   | chromatin modifying protein 2A<br>aldehyde dehydrogenase 18 family, member        |
| 5832   | ALDH18A1 | A1                                                                                |
| 2125   | EVPL     | envoplakin                                                                        |
| 6422   | SFRP1    | secreted frizzled-related protein 1                                               |
| 127544 | IBRDC3   | IBR domain containing 3<br>acyl-CoA synthetase long-chain family                  |
| 51703  | ACSL5    | member 5                                                                          |
| 85464  | SSH2     | slingshot homolog 2 (Drosophila)                                                  |
| 114882 | OSBPL8   | oxysterol binding protein-like 8                                                  |
| 55520  | ELAC1    | elaC homolog 1 (E. coli)                                                          |
| 408    | ARRB1    | arrestin, beta 1                                                                  |
| 11178  | LZTS1    | leucine zipper, putative tumor suppressor 1                                       |
| 2762   | GMDS     | GDP-mannose 4,6-dehydratase                                                       |
| 221322 | C6orf170 | chromosome 6 open reading frame 170<br>translocated promoter region (to activated |
| 7175   | TPR      | MET oncogene)                                                                     |
| 444    | ASPH     | aspartate beta-hydroxylase                                                        |
| 84318  | CCDC77   | coiled-coil domain containing 77<br>5-aminoimidazole-4-carboxamide                |
| 471    | ATIC     | ribonucleotide formyltransferase/IMP<br>cyclohydrolase                            |
| 966    | CD59     | CD59 molecule, complement regulatory                                              |
| 2828   | GPR4     | protein                                                                           |
| 57486  | NLN      | G protein-coupled receptor 4<br>neurolysin (metallopeptidase M3 family)           |
| 1994   | ELAVL1   | ELAV (embryonic lethal, abnormal vision,<br>Drosophila)-like 1 (Hu antigen R)     |
| 6484   | ST3GAL4  | ST3 beta-galactoside alpha-2,3-<br>sialyltransferase 4                            |
| 10902  | BRD8     | bromodomain containing 8                                                          |
| 5664   | PSEN2    | presenilin 2 (Alzheimer disease 4)                                                |
| 5664   | PSEN2    | presenilin 2 (Alzheimer disease 4)                                                |
| 57685  | CACHD1   | cache domain containing 1                                                         |
| 81567  | TXNDC5   | thioredoxin domain containing 5<br>mutL homolog 1, colon cancer, nonpolyposis     |
| 4292   | MLH1     | type 2 (E. coli)                                                                  |
| 10252  | SPRY1    | sprouty homolog 1, antagonist of FGF<br>signaling (Drosophila)                    |
| 79817  | MOBKL2B  | MOB1, Mps One Binder kinase activator-like<br>2B (yeast)                          |
| 9673   | SLC25A44 | solute carrier family 25, member 44                                               |
| 80144  | FRAS1    | Fraser syndrome 1                                                                 |
| 23469  | PHF3     | PHD finger protein 3<br>solute carrier family 22 (organic cation                  |
| 5002   | SLC22A18 | transporter), member 18                                                           |

|        |          |                                                                                                          |
|--------|----------|----------------------------------------------------------------------------------------------------------|
| 5204   | PFDN5    | prefoldin subunit 5                                                                                      |
| 57216  | VANGL2   | vang-like 2 (van gogh, Drosophila)                                                                       |
| 9919   | KIAA0310 | KIAA0310                                                                                                 |
| 8809   | IL18R1   | interleukin 18 receptor 1                                                                                |
| 54454  | KIAA1240 | KIAA1240 protein                                                                                         |
| 9904   | RBM19    | RNA binding motif protein 19                                                                             |
| 5522   | PPP2R2C  | protein phosphatase 2 (formerly 2A),<br>regulatory subunit B (PR 52), gamma isoform                      |
| 4664   | NAB1     | NGFI-A binding protein 1 (EGR1 binding<br>protein 1)                                                     |
| 27065  | D4S234E  | DNA segment on chromosome 4 (unique) 234<br>expressed sequence                                           |
| 51808  | RNUXA    | RNA U, small nuclear RNA export adaptor<br>(phosphorylation regulated)                                   |
| 4045   | LSAMP    | limbic system-associated membrane protein                                                                |
| 23515  | MORC3    | MORC family CW-type zinc finger 3                                                                        |
| 80824  | DUSP16   | dual specificity phosphatase 16                                                                          |
| 54881  | TEX10    | testis expressed sequence 10                                                                             |
| 10237  | SLC35B1  | solute carrier family 35, member B1                                                                      |
| 158399 | ZNF483   | zinc finger protein 483                                                                                  |
| 9093   | DNAJA3   | DnaJ (Hsp40) homolog, subfamily A, member<br>3                                                           |
| 10286  | BCAS2    | breast carcinoma amplified sequence 2                                                                    |
| 3678   | ITGA5    | integrin, alpha 5 (fibronectin receptor, alpha<br>polypeptide)                                           |
| 64708  | COPS7B   | COP9 constitutive photomorphogenic<br>homolog subunit 7B (Arabidopsis)                                   |
| 23301  | EHBP1    | EH domain binding protein 1                                                                              |
| 1910   | EDNRB    | endothelin receptor type B                                                                               |
| 57488  | FAM62B   | family with sequence similarity 62 (C2<br>domain containing) member B                                    |
| 55075  | UACA     | uveal autoantigen with coiled-coil domains<br>and ankyrin repeats                                        |
| 6125   | RPL5     | ribosomal protein L5                                                                                     |
| 221178 | SPATA13  | spermatogenesis associated 13                                                                            |
| 9669   | EIF5B    | eukaryotic translation initiation factor 5B                                                              |
| 5054   | SERPINE1 | serpin peptidase inhibitor, clade E (nexin,<br>plasminogen activator inhibitor type 1),<br>member 1      |
| 1956   | EGFR     | epidermal growth factor receptor<br>(erythroblastic leukemia viral (v-erb-b)<br>oncogene homolog, avian) |
| 55589  | BMP2K    | BMP2 inducible kinase                                                                                    |
| 22837  | COBLL1   | COBL-like 1                                                                                              |
| 6326   | SCN2A2   | sodium channel, voltage-gated, type II, alpha<br>2                                                       |
| 8910   | SGCE     | sarcoglycan, epsilon                                                                                     |
| 84900  | TMEM118  | transmembrane protein 118                                                                                |

|        |          |                                                                                                                        |
|--------|----------|------------------------------------------------------------------------------------------------------------------------|
| 10195  | ALG3     | asparagine-linked glycosylation 3 homolog (S. cerevisiae, alpha-1,3-mannosyltransferase)                               |
| 27339  | PRPF19   | PRP19/PSO4 pre-mRNA processing factor 19 homolog (S. cerevisiae)                                                       |
| 6671   | SP4      | Sp4 transcription factor                                                                                               |
| 79656  | C1orf165 | chromosome 1 open reading frame 165                                                                                    |
| 1192   | CLIC1    | chloride intracellular channel 1                                                                                       |
| 5495   | PPM1B    | protein phosphatase 1B (formerly 2C), magnesium-dependent, beta isoform bromodomain adjacent to zinc finger domain, 2B |
| 29994  | BAZ2B    |                                                                                                                        |
| 65983  | GRAMD3   | GRAM domain containing 3                                                                                               |
| 5864   | RAB3A    | RAB3A, member RAS oncogene family                                                                                      |
| 2901   | GRIK5    | glutamate receptor, ionotropic, kainate 5                                                                              |
| 56995  | TULP4    | tubby like protein 4                                                                                                   |
| 8560   | DEGS1    | degenerative spermatocyte homolog 1, lipid desaturase (Drosophila)                                                     |
| 25813  | SAMM50   | sorting and assembly machinery component 50 homolog (S. cerevisiae)                                                    |
| 51097  | SCCPDH   | saccharopine dehydrogenase (putative)                                                                                  |
| 116840 | CNTROB   | centrobin, centrosomal BRCA2 interacting protein                                                                       |
| 92454  | PRR8     | proline rich 8                                                                                                         |
| 60681  | FKBP10   | FK506 binding protein 10, 65 kDa                                                                                       |
| 4199   | ME1      | malic enzyme 1, NADP(+)-dependent, cytosolic                                                                           |
| 4199   | ME1      | malic enzyme 1, NADP(+)-dependent, cytosolic                                                                           |
| 2113   | ETS1     | v-ets erythroblastosis virus E26 oncogene homolog 1 (avian)                                                            |
| 51094  | ADIPOR1  | adiponectin receptor 1                                                                                                 |
| 404093 | CUEDC1   | CUE domain containing 1                                                                                                |
| 2686   | GGTL3    | gamma-glutamyltransferase-like 3                                                                                       |
| 128    | ADH5     | alcohol dehydrogenase 5 (class III), chi polypeptide                                                                   |
| 2145   | EZH1     | enhancer of zeste homolog 1 (Drosophila)                                                                               |
| 94241  | TP53INP1 | tumor protein p53 inducible nuclear protein 1                                                                          |
| 4839   | NOL1     | nucleolar protein 1, 120kDa                                                                                            |
| 55758  | RCOR3    | REST corepressor 3                                                                                                     |
| 64223  | GBL      | G protein beta subunit-like                                                                                            |
| 84826  | SFT2D3   | SFT2 domain containing 3                                                                                               |
| 4072   | TACSTD1  | tumor-associated calcium signal transducer 1                                                                           |
| 11197  | WIF1     | WNT inhibitory factor 1                                                                                                |
| 55743  | CHFR     | checkpoint with forkhead and ring finger domains                                                                       |
| 55701  | FLJ10357 | hypothetical protein FLJ10357                                                                                          |
| 57134  | MAN1C1   | mannosidase, alpha, class 1C, member 1                                                                                 |
| 152137 | CCDC50   | coiled-coil domain containing 50                                                                                       |



|        |          |                                                                                 |
|--------|----------|---------------------------------------------------------------------------------|
| 1615   | DARS     | aspartyl-tRNA synthetase                                                        |
| 7022   | TFAP2C   | transcription factor AP-2 gamma (activating enhancer binding protein 2 gamma)   |
| 92241  | RCSD1    | RCSD domain containing 1                                                        |
| 10099  | TSPAN3   | tetraspanin 3                                                                   |
| 79086  | C19orf42 | chromosome 19 open reading frame 42                                             |
| 55149  | PAPD1    | PAP associated domain containing 1                                              |
| 9551   | ATP5J2   | ATP synthase, H+ transporting, mitochondrial F0 complex, subunit F2             |
| 2934   | GSN      | gelsolin (amyloidosis, Finnish type)                                            |
| 10806  | SDCCAG8  | serologically defined colon cancer antigen 8                                    |
| 1213   | CLTC     | clathrin, heavy chain (Hc)                                                      |
| 1908   | EDN3     | endothelin 3                                                                    |
| 29015  | SLC43A3  | solute carrier family 43, member 3                                              |
| 6453   | ITSN1    | intersectin 1 (SH3 domain protein)                                              |
| 10516  | FBLN5    | fibulin 5                                                                       |
| 51340  | CRNKL1   | Crn, crooked neck-like 1 (Drosophila)                                           |
| 7586   | ZKSCAN1  | zinc finger with KRAB and SCAN domains 1                                        |
| 79441  | C4orf15  | chromosome 4 open reading frame 15                                              |
| 55643  | BTBD2    | BTB (POZ) domain containing 2                                                   |
| 51704  | GPRC5B   | G protein-coupled receptor, family C, group 5, member B                         |
| 201134 | CCDC46   | coiled-coil domain containing 46                                                |
| 10797  | MTHFD2   | methylenetetrahydrofolate dehydrogenase (NADP+ dependent) 2,                    |
| 10914  | PAPOLA   | methenyltetrahydrofolate cyclohydrolase                                         |
| 3655   | ITGA6    | poly(A) polymerase alpha integrin, alpha 6                                      |
| 7517   | XRCC3    | X-ray repair complementing defective repair in Chinese hamster cells 3          |
| 1382   | CRABP2   | cellular retinoic acid binding protein 2                                        |
| 11218  | DDX20    | DEAD (Asp-Glu-Ala-Asp) box polypeptide 20 mitochondrial methionyl-tRNA          |
| 123263 | MTFMT    | formyltransferase                                                               |
| 6641   | SNTB1    | syntrophin, beta 1 (dystrophin-associated protein A1, 59kDa, basic component 1) |
| 23385  | NCSTN    | nicastrin                                                                       |
| 55030  | FBXO34   | F-box protein 34                                                                |
| 5360   | PLTP     | phospholipid transfer protein                                                   |
| 10102  | TSFM     | Ts translation elongation factor, mitochondrial                                 |
| 7741   | ZNF187   | zinc finger protein 187                                                         |
| 8503   | PIK3R3   | phosphoinositide-3-kinase, regulatory subunit 3 (p55, gamma)                    |
| 142    | PARP1    | poly (ADP-ribose) polymerase family, member 1                                   |
| 50650  | ARHGEF3  | Rho guanine nucleotide exchange factor (GEF) 3                                  |

|        |          |                                                                                  |
|--------|----------|----------------------------------------------------------------------------------|
| 57414  | RHBD2    | rhomboid domain containing 2                                                     |
| 4660   | PPP1R12B | protein phosphatase 1, regulatory (inhibitor) subunit 12B                        |
| 3815   | KIT      | v-kit Hardy-Zuckerman 4 feline sarcoma viral oncogene homolog                    |
| 29890  | RBM15B   | RNA binding motif protein 15B                                                    |
| 1036   | CDO1     | cysteine dioxygenase, type I                                                     |
| 91     | ACVR1B   | activin A receptor, type IB                                                      |
| 2568   | GABRP    | gamma-aminobutyric acid (GABA) A receptor, pi                                    |
| 55627  | SMPD4    | sphingomyelin phosphodiesterase 4, neutral membrane (neutral sphingomyelinase-3) |
| 92715  | WDR85    | WD repeat domain 85                                                              |
| 79654  | HECTD3   | HECT domain containing 3                                                         |
| 55697  | VAC14    | Vac14 homolog ( <i>S. cerevisiae</i> )                                           |
| 10476  | ATP5H    | ATP synthase, H <sup>+</sup> transporting, mitochondrial F0 complex, subunit d   |
| 51246  | SCOTIN   | scotin                                                                           |
| 4940   | OAS3     | 2'-5'-oligoadenylate synthetase 3, 100kDa                                        |
| 55713  | ZNF334   | zinc finger protein 334                                                          |
| 80023  | NRSN2    | neurensin 2                                                                      |
| 146198 | ZFP90    | zinc finger protein 90 homolog (mouse)                                           |
| 7169   | TPM2     | tropomyosin 2 (beta)                                                             |
| 55276  | PGM2     | phosphoglucomutase 2                                                             |
| 23623  | RUSC1    | RUN and SH3 domain containing 1                                                  |
| 55501  | CHST12   | carbohydrate (chondroitin 4) sulfotransferase 12                                 |
| 143282 | C10orf13 | chromosome 10 open reading frame 13                                              |
| 23059  | CLUAP1   | clusterin associated protein 1                                                   |
| 56990  | CDC42SE2 | CDC42 small effector 2                                                           |
| 2041   | EPHA1    | EPH receptor A1                                                                  |
| 5430   | POLR2A   | polymerase (RNA) II (DNA directed) polypeptide A, 220kDa                         |
| 9314   | KLF4     | Kruppel-like factor 4 (gut)                                                      |
| 25831  | HECTD1   | HECT domain containing 1                                                         |
| 266812 | NAP1L5   | nucleosome assembly protein 1-like 5                                             |
| 6944   | VPS72    | vacuolar protein sorting 72 ( <i>S. cerevisiae</i> )                             |
| 51167  | CYB5R4   | cytochrome b5 reductase 4                                                        |
| 54622  | ARL15    | ADP-ribosylation factor-like 15                                                  |
| 29083  | GTPBP8   | GTP-binding protein 8 (putative)                                                 |
| 7043   | TGFB3    | transforming growth factor, beta 3                                               |
| 108    | ADCY2    | adenylate cyclase 2 (brain)                                                      |
| 8939   | FUBP3    | far upstream element (FUSE) binding protein 3                                    |
| 10011  | SRA1     | steroid receptor RNA activator 1                                                 |
| 5424   | POLD1    | polymerase (DNA directed), delta 1, catalytic subunit 125kDa                     |
| 8694   | DGAT1    | diacylglycerol O-acyltransferase homolog 1 (mouse)                               |
| 165215 | KIAA1946 | KIAA1946                                                                         |

|        |              |                                                                                                       |
|--------|--------------|-------------------------------------------------------------------------------------------------------|
|        |              | guanine nucleotide binding protein (G protein), alpha activating activity polypeptide, olfactory type |
| 2774   | GNAL         |                                                                                                       |
| 7738   | ZNF184       | zinc finger protein 184                                                                               |
| 399687 | MYO18A       | myosin XVIII A                                                                                        |
| 85363  | TRIM5        | tripartite motif-containing 5                                                                         |
| 23008  | KIAA0265     | KIAA0265 protein                                                                                      |
| 1837   | DTNA         | dystrobrevin, alpha                                                                                   |
| 10600  | USP16        | ubiquitin specific peptidase 16                                                                       |
| 7570   | ZNF22        | zinc finger protein 22 (KOX 15)                                                                       |
| 7389   | UROD         | uroporphyrinogen decarboxylase                                                                        |
| 64116  | SLC39A8      | solute carrier family 39 (zinc transporter), member 8                                                 |
| 81614  | NIPA2        | non imprinted in Prader-Willi/Angelman syndrome 2                                                     |
| 11001  | SLC27A2      | solute carrier family 27 (fatty acid transporter), member 2                                           |
| 10298  | PAK4         | p21(CDKN1A)-activated kinase 4                                                                        |
| 6283   | S100A12      | S100 calcium binding protein A12                                                                      |
| 64419  | C3orf29      | chromosome 3 open reading frame 29                                                                    |
| 8559   | PRPF18       | PRP18 pre-mRNA processing factor 18 homolog ( <i>S. cerevisiae</i> )                                  |
| 91050  | DKFZp761B107 | hypothetical protein DKFZp761B107                                                                     |
| 23203  | PMPCA        | peptidase (mitochondrial processing) alpha                                                            |
| 84450  | ZNF512       | zinc finger protein 512                                                                               |
| 8031   | NCOA4        | nuclear receptor coactivator 4                                                                        |
| 29965  | C16orf5      | chromosome 16 open reading frame 5                                                                    |
| 23351  | KIAA0323     | KIAA0323                                                                                              |
| 160760 | PPTC7        | PTC7 protein phosphatase homolog ( <i>S. cerevisiae</i> )                                             |
| 3791   | KDR          | kinase insert domain receptor (a type III receptor tyrosine kinase)                                   |
| 51061  | TXNDC11      | thioredoxin domain containing 11                                                                      |
| 23225  | NUP210       | nucleoporin 210kDa                                                                                    |
| 54894  | RNF43        | ring finger protein 43                                                                                |
| 9806   | SPOCK2       | sparc/osteonectin, cwcv and kazal-like domains proteoglycan (testican) 2                              |
| 4640   | MYO1A        | myosin IA                                                                                             |
| 8880   | FUBP1        | far upstream element (FUSE) binding protein 1                                                         |
| 1456   | CSNK1G3      | casein kinase 1, gamma 3                                                                              |
| 317762 | C14orf65     | chromosome 14 open reading frame 65                                                                   |
| 22948  | CCT5         | chaperonin containing TCP1, subunit 5 (epsilon)                                                       |
| 6853   | SYN1         | synapsin I                                                                                            |
| 79017  | C7orf24      | chromosome 7 open reading frame 24                                                                    |
| 7402   | UTRN         | utrophin (homologous to dystrophin)                                                                   |
| 60559  | SPCS3        | signal peptidase complex subunit 3 homolog ( <i>S. cerevisiae</i> )                                   |
| 7353   | UFD1L        | ubiquitin fusion degradation 1 like (yeast)                                                           |

|        |               |                                                                                                                                           |
|--------|---------------|-------------------------------------------------------------------------------------------------------------------------------------------|
| 5066   | PAM           | peptidylglycine alpha-amidating monooxygenase                                                                                             |
| 9925   | ZBTB5         | zinc finger and BTB domain containing 5 SWI/SNF related, matrix associated, actin dependent regulator of chromatin, subfamily a, member 3 |
| 6596   | SMARCA3       |                                                                                                                                           |
| 51411  | BIN2          | bridging integrator 2                                                                                                                     |
| 80325  | ABTB1         | ankyrin repeat and BTB (POZ) domain containing 1                                                                                          |
| 813    | CALU          | calumenin                                                                                                                                 |
| 25875  | LETMD1        | LETM1 domain containing 1                                                                                                                 |
| 54825  | PCLKC         | protocadherin LKC                                                                                                                         |
| 54716  | SLC6A20       | solute carrier family 6 (proline IMINO transporter), member 20                                                                            |
| 91156  | DKFZp434B1231 | eEF1A2 binding protein                                                                                                                    |
| 10539  | TXNL2         | thioredoxin-like 2                                                                                                                        |
| 9933   | KIAA0020      | KIAA0020                                                                                                                                  |
| 1479   | CSTF3         | cleavage stimulation factor, 3' pre-RNA, subunit 3, 77kDa                                                                                 |
| 23034  | SAMD4A        | sterile alpha motif domain containing 4A                                                                                                  |
| 84246  | MED10         | mediator of RNA polymerase II transcription, subunit 10 homolog (NUT2, <i>S. cerevisiae</i> )                                             |
| 3689   | ITGB2         | integrin, beta 2 (complement component 3 receptor 3 and 4 subunit)                                                                        |
| 65005  | MRPL9         | mitochondrial ribosomal protein L9                                                                                                        |
| 79758  | DHRS12        | dehydrogenase/reductase (SDR family) member 12                                                                                            |
| 80271  | ITPKC         | inositol 1,4,5-trisphosphate 3-kinase C                                                                                                   |
| 246243 | RNASEH1       | ribonuclease H1                                                                                                                           |
| 55315  | SLC29A3       | solute carrier family 29 (nucleoside transporters), member 3                                                                              |
| 56950  | SMYD2         | SET and MYND domain containing 2                                                                                                          |
| 6464   | SHC1          | SHC (Src homology 2 domain containing) transforming protein 1                                                                             |
| 10982  | MAPRE2        | microtubule-associated protein, RP/EB family, member 2                                                                                    |
| 84173  | RBED1         | RNA binding motif and ELMO/CED-12 domain 1                                                                                                |
| 25983  | NGDN          | neuroguidin, EIF4E binding protein                                                                                                        |
| 64333  | ARHGAP9       | Rho GTPase activating protein 9                                                                                                           |
| 51110  | LACTB2        | lactamase, beta 2                                                                                                                         |
| 57605  | PITPNM2       | phosphatidylinositol transfer protein, membrane-associated 2                                                                              |
| 23316  | CUTL2         | cut-like 2 ( <i>Drosophila</i> )                                                                                                          |
| 8987   | GENX-3414     | genethonin 1                                                                                                                              |
| 11164  | NUDT5         | nudix (nucleoside diphosphate linked moiety X)-type motif 5                                                                               |
| 8541   | PPFIA3        | protein tyrosine phosphatase, receptor type, f polypeptide (PTPRF), interacting protein (liprin), alpha 3                                 |

|        |          |                                                                                             |
|--------|----------|---------------------------------------------------------------------------------------------|
| 10324  | KBTBD10  | kelch repeat and BTB (POZ) domain containing 10                                             |
| 7840   | ALMS1    | Alstrom syndrome 1                                                                          |
| 9712   | USP6NL   | USP6 N-terminal like                                                                        |
| 26156  | RSL1D1   | ribosomal L1 domain containing 1                                                            |
| 25903  | OLFML2B  | olfactomedin-like 2B                                                                        |
| 6553   | SLC9A5   | solute carrier family 9 (sodium/hydrogen exchanger), member 5                               |
| 9486   | CHST10   | carbohydrate sulfotransferase 10                                                            |
| 10762  | NUP50    | nucleoporin 50kDa                                                                           |
| 63901  | FAM111A  | family with sequence similarity 111, member A                                               |
| 30827  | CXXC1    | CXXC finger 1 (PHD domain)                                                                  |
| 8463   | TEAD2    | TEA domain family member 2                                                                  |
| 5034   | P4HB     | procollagen-proline, 2-oxoglutarate 4-dioxygenase (proline 4-hydroxylase), beta polypeptide |
| 6014   | RIT2     | Ras-like without CAAX 2                                                                     |
| 10464  | C13orf24 | chromosome 13 open reading frame 24                                                         |
| 285704 | RGMB     | RGM domain family, member B                                                                 |
| 64376  | IKZF5    | IKAROS family zinc finger 5 (Pegasus)                                                       |
| 85450  | KIAA1754 | KIAA1754                                                                                    |
| 6738   | TROVE2   | TROVE domain family, member 2                                                               |
| 25847  | ANAPC13  | anaphase promoting complex subunit 13                                                       |
| 5074   | PAWR     | PRKC, apoptosis, WT1, regulator                                                             |
| 9580   | SOX13    | SRY (sex determining region Y)-box 13                                                       |
| 5810   | RAD1     | RAD1 homolog (S. pombe)                                                                     |
| 23061  | TBC1D9B  | TBC1 domain family, member 9B (with GRAM domain)                                            |
| 11164  | NUDT5    | nudix (nucleoside diphosphate linked moiety X)-type motif 5                                 |
| 123    | ADFP     | adipose differentiation-related protein                                                     |
| 1827   | DSCR1    | Down syndrome critical region gene 1                                                        |
| 6732   | SRPK1    | SFRS protein kinase 1                                                                       |
| 3219   | HOXB9    | homeobox B9                                                                                 |
| 80209  | C13orf23 | chromosome 13 open reading frame 23                                                         |
| 10745  | PHTF1    | putative homeodomain transcription factor 1                                                 |
| 2992   | GYG1     | glycogenin 1                                                                                |
| 1880   | EBI2     | Epstein-Barr virus induced gene 2 (lymphocyte-specific G protein-coupled receptor)          |
| 26504  | CNNM4    | cyclin M4                                                                                   |
| 57482  | KIAA1211 | KIAA1211 protein                                                                            |
| 64115  | C10orf54 | chromosome 10 open reading frame 54                                                         |
| 64778  | FNDC3B   | fibronectin type III domain containing 3B                                                   |
| 93624  | MGC21874 | transcriptional adaptor 2 (ADA2 homolog, yeast)-beta                                        |
| 203054 | ADCK5    | aarF domain containing kinase 5                                                             |
| 23154  | NCDN     | neurochondrin                                                                               |
| 150465 | TTL      | tubulin tyrosine ligase                                                                     |
| 79767  | ELMO3    | engulfment and cell motility 3                                                              |

|        |          |                                                                                          |
|--------|----------|------------------------------------------------------------------------------------------|
| 57464  | FAM40B   | family with sequence similarity 40, member B                                             |
| 60625  | DHX35    | DEAH (Asp-Glu-Ala-His) box polypeptide 35                                                |
| 1386   | ATF2     | activating transcription factor 2                                                        |
| 6813   | STXBP2   | syntaxin binding protein 2                                                               |
| 6122   | RPL3     | ribosomal protein L3                                                                     |
| 8676   | STX11    | syntaxin 11                                                                              |
| 9404   | LPXN     | leupaxin                                                                                 |
| 27352  | RUTBC3   | RUN and TBC1 domain containing 3                                                         |
| 23277  | KIAA0664 | KIAA0664                                                                                 |
| 55314  | TMEM144  | transmembrane protein 144                                                                |
| 10714  | POLD3    | polymerase (DNA-directed), delta 3, accessory subunit                                    |
| 79009  | DDX50    | DEAD (Asp-Glu-Ala-Asp) box polypeptide 50                                                |
| 9725   | TMEM63A  | transmembrane protein 63A                                                                |
| 50507  | NOX4     | NADPH oxidase 4                                                                          |
| 23122  | CLASP2   | cytoplasmic linker associated protein 2                                                  |
| 80169  | C17orf68 | chromosome 17 open reading frame 68                                                      |
| 23085  | ERC1     | ELKS/RAB6-interacting/CAST family member 1                                               |
| 58155  | PTBP2    | polypyrimidine tract binding protein 2                                                   |
| 4140   | MARK3    | MAP/microtubule affinity-regulating kinase 3                                             |
| 220972 | MARCH8   | membrane-associated ring finger (C3HC4) 8                                                |
| 9899   | SV2B     | synaptic vesicle glycoprotein 2B                                                         |
| 80700  | UBXD1    | UBX domain containing 1                                                                  |
| 4739   | NEDD9    | neural precursor cell expressed, developmentally down-regulated 9                        |
| 4145   | MATK     | megakaryocyte-associated tyrosine kinase                                                 |
| 26052  | DNM3     | dynamamin 3                                                                              |
| 7559   | ZNF12    | zinc finger protein 12                                                                   |
| 4054   | LTBP3    | latent transforming growth factor beta binding protein 3                                 |
| 84254  | CAMKK1   | calcium/calmodulin-dependent protein kinase kinase 1, alpha                              |
| 64342  | HS1BP3   | HCLS1 binding protein 3                                                                  |
| 55510  | DDX43    | DEAD (Asp-Glu-Ala-Asp) box polypeptide 43                                                |
| 10492  | SYNCRIP  | synaptotagmin binding, cytoplasmic RNA interacting protein                               |
| 55677  | IWS1     | IWS1 homolog (S. cerevisiae)                                                             |
| 6421   | SFPQ     | splicing factor proline/glutamine-rich (polypyrimidine tract binding protein associated) |
| 53615  | MBD3     | methyl-CpG binding domain protein 3                                                      |
| 9813   | KIAA0494 | KIAA0494                                                                                 |
| 10494  | STK25    | serine/threonine kinase 25 (STE20 homolog, yeast)                                        |

|        |           |                                                                                            |
|--------|-----------|--------------------------------------------------------------------------------------------|
| 10755  | GIPC1     | GIPC PDZ domain containing family, member 1                                                |
| 65010  | SLC26A6   | solute carrier family 26, member 6                                                         |
| 199692 | ZNF627    | zinc finger protein 627                                                                    |
| 54809  | SAMD9     | sterile alpha motif domain containing 9                                                    |
| 23552  | CCRK      | cell cycle related kinase                                                                  |
| 9063   | PIAS2     | protein inhibitor of activated STAT, 2                                                     |
| 10131  | TRAP1     | TNF receptor-associated protein 1                                                          |
| 50717  | WDR42A    | WD repeat domain 42A                                                                       |
| 9927   | MFN2      | mitofusin 2                                                                                |
| 9927   | MFN2      | mitofusin 2                                                                                |
| 8218   | CLTCL1    | clathrin, heavy chain-like 1                                                               |
| 8218   | CLTCL1    | clathrin, heavy chain-like 1                                                               |
| 6242   | RTKN      | rhotekin                                                                                   |
| 10664  | CTCF      | CCCTC-binding factor (zinc finger protein) protein phosphatase 1H (PP2C domain containing) |
| 57460  | PPM1H     | misshapen-like kinase 1 (zebrafish)                                                        |
| 50488  | MINK1     | misshapen-like kinase 1 (zebrafish)                                                        |
| 23412  | COMMD3    | COMM domain containing 3                                                                   |
| 4171   | MCM2      | MCM2 minichromosome maintenance deficient 2, mitotin ( <i>S. cerevisiae</i> )              |
| 23213  | SULF1     | sulfatase 1                                                                                |
| 5653   | KLK6      | kallikrein-related peptidase 6                                                             |
| 55917  | CTTNBP2NL | CTTNBP2 N-terminal like                                                                    |
| 55917  | CTTNBP2NL | CTTNBP2 N-terminal like                                                                    |
| 9732   | DOCK4     | dedicator of cytokinesis 4                                                                 |
| 25938  | C14orf125 | chromosome 14 open reading frame 125                                                       |
| 8895   | CPNE3     | copine III                                                                                 |
| 10874  | NMU       | neuromedin U                                                                               |
| 114881 | OSBPL7    | oxysterol binding protein-like 7                                                           |
| 64122  | FN3K      | fructosamine 3 kinase                                                                      |
| 84186  | ZCCHC7    | zinc finger, CCHC domain containing 7                                                      |
| 1374   | CPT1A     | carnitine palmitoyltransferase 1A (liver)                                                  |
| 27340  | UTP20     | UTP20, small subunit (SSU) processome component, homolog (yeast)                           |
| 29964  | C6orf49   | chromosome 6 open reading frame 49                                                         |
| 6821   | SUOX      | sulfite oxidase                                                                            |
| 112483 | SAT2      | spermidine/spermine N1-acetyltransferase 2                                                 |
| 6434   | SFRS10    | splicing factor, arginine/serine-rich 10 (transformer 2 homolog, <i>Drosophila</i> )       |
| 4552   | MTRR      | 5-methyltetrahydrofolate-homocysteine methyltransferase reductase                          |
| 6809   | STX3      | syntaxin 3                                                                                 |
| 4283   | CXCL9     | chemokine (C-X-C motif) ligand 9                                                           |
| 57631  | LRCH2     | leucine-rich repeats and calponin homology (CH) domain containing 2                        |
| 579    | BAPX1     | bagpipe homeobox homolog 1 ( <i>Drosophila</i> )                                           |
| 23007  | PLCH1     | phospholipase C, eta 1                                                                     |
| 83892  | KCTD10    | potassium channel tetramerisation domain containing 10                                     |

|        |          |                                                                                                |
|--------|----------|------------------------------------------------------------------------------------------------|
| 283377 | SPRYD4   | SPRY domain containing 4                                                                       |
| 23246  | BOP1     | block of proliferation 1                                                                       |
| 109    | ADCY3    | adenylate cyclase 3                                                                            |
| 10989  | IMMT     | inner membrane protein, mitochondrial (mitofilin)                                              |
| 547    | KIF1A    | kinesin family member 1A                                                                       |
| 23463  | ICMT     | isoprenylcysteine carboxyl methyltransferase                                                   |
| 79078  | C1orf50  | chromosome 1 open reading frame 50                                                             |
| 26301  | GBGT1    | globoside alpha-1,3-N-acetylgalactosaminyltransferase 1                                        |
| 54617  | INOC1    | INO80 complex homolog 1 ( <i>S. cerevisiae</i> )                                               |
| 6625   | SNRP70   | small nuclear ribonucleoprotein 70kDa                                                          |
| 7436   | VLDLR    | polypeptide (RNP antigen)                                                                      |
| 3572   | IL6ST    | very low density lipoprotein receptor                                                          |
| 79876  | UBE1DC1  | interleukin 6 signal transducer (gp130, oncostatin M receptor)                                 |
| 5257   | PHKB     | ubiquitin-activating enzyme E1-domain containing 1                                             |
| 10635  | RAD51AP1 | phosphorylase kinase, beta                                                                     |
| 2926   | GRSF1    | RAD51 associated protein 1                                                                     |
| 10979  | PLEKHC1  | G-rich RNA sequence binding factor 1                                                           |
| 1501   | CTNND2   | pleckstrin homology domain containing, family C (with FERM domain) member 1                    |
| 820    | CAMP     | catenin (cadherin-associated protein), delta 2 (neural plakophilin-related arm-repeat protein) |
| 221477 | C6orf89  | cathelicidin antimicrobial peptide                                                             |
| 26115  | TANC2    | chromosome 6 open reading frame 89                                                             |
| 55230  | USP40    | tetratricopeptide repeat, ankyrin repeat and coiled-coil containing 2                          |
| 23405  | DICER1   | ubiquitin specific peptidase 40                                                                |
| 1607   | DGKB     | Dicer1, Dcr-1 homolog ( <i>Drosophila</i> )                                                    |
| 9685   | CLINT1   | diacylglycerol kinase, beta 90kDa                                                              |
| 3394   | IRF8     | clathrin interactor 1                                                                          |
| 857    | CAV1     | interferon regulatory factor 8                                                                 |
| 25948  | KBTBD2   | caveolin 1, caveolae protein, 22kDa                                                            |
| 1153   | CIRBP    | kelch repeat and BTB (POZ) domain containing 2                                                 |
| 2219   | FCN1     | cold inducible RNA binding protein                                                             |
| 55624  | POMGNT1  | ficolin (collagen/fibrinogen domain containing) 1                                              |
| 2057   | EPOR     | protein O-linked mannose beta1,2-N-acetylglucosaminyltransferase                               |
| 23435  | TARDBP   | erythropoietin receptor                                                                        |
| 23435  | TARDBP   | TAR DNA binding protein                                                                        |
| 2213   | FCGR2B   | TAR DNA binding protein                                                                        |
| 60686  | C14orf93 | Fc fragment of IgG, low affinity IIb, receptor (CD32)                                          |
|        |          | chromosome 14 open reading frame 93                                                            |



|        |          |                                                                                                          |
|--------|----------|----------------------------------------------------------------------------------------------------------|
| 57553  | MICAL3   | microtubule associated monooxygenase,                                                                    |
| 57510  | XPO5     | calponin and LIM domain containing 3<br>exportin 5                                                       |
| 6405   | SEMA3F   | sema domain, immunoglobulin domain (Ig),<br>short basic domain, secreted, (semaphorin)<br>3F             |
| 719    | C3AR1    | complement component 3a receptor 1                                                                       |
| 55118  | CRTAC1   | cartilage acidic protein 1                                                                               |
| 6608   | SMO      | smoothened homolog (Drosophila)                                                                          |
| 25999  | CLIPR-59 | CLIP-170-related protein                                                                                 |
| 55224  | ETNK2    | ethanolamine kinase 2                                                                                    |
| 400    | ARL1     | ADP-ribosylation factor-like 1                                                                           |
| 157247 | MGC27345 | hypothetical protein MGC27345                                                                            |
| 54838  | C10orf26 | chromosome 10 open reading frame 26                                                                      |
| 3667   | IRS1     | insulin receptor substrate 1                                                                             |
| 51760  | SYT17    | synaptotagmin XVII<br>Rho guanine nucleotide exchange factor<br>(GEF) 1                                  |
| 9138   | ARHGEF1  |                                                                                                          |
| 3658   | IREB2    | iron-responsive element binding protein 2                                                                |
| 6035   | RNASE1   | ribonuclease, RNase A family, 1 (pancreatic)                                                             |
| 284459 | HKR1     | GLI-Kruppel family member HKR1<br>OMA1 homolog, zinc metallopeptidase (S.<br>cerevisiae)                 |
| 115209 | OMA1     |                                                                                                          |
| 5184   | PEPD     | peptidase D<br>intraflagellar transport 57 homolog<br>(Chlamydomonas)                                    |
| 55081  | IFT57    |                                                                                                          |
| 9658   | ZNF516   | zinc finger protein 516<br>cholinergic receptor, nicotinic, beta 1<br>(muscle)                           |
| 1140   | CHRNB1   |                                                                                                          |
| 2139   | EYA2     | eyes absent homolog 2 (Drosophila)<br>CDC45 cell division cycle 45-like (S.<br>cerevisiae)               |
| 8318   | CDC45L   |                                                                                                          |
| 8318   | CDC45L   | CDC45 cell division cycle 45-like (S.<br>cerevisiae)                                                     |
| 677    | ZFP36L1  | zinc finger protein 36, C3H type-like 1                                                                  |
| 6774   | STAT3    | signal transducer and activator of<br>transcription 3 (acute-phase response factor)                      |
| 84986  | ARHGAP19 | Rho GTPase activating protein 19<br>signal transducing adaptor molecule (SH3<br>domain and ITAM motif) 1 |
| 8027   | STAM     |                                                                                                          |
| 4846   | NOS3     | nitric oxide synthase 3 (endothelial cell)                                                               |
| 51093  | C1orf66  | chromosome 1 open reading frame 66<br>Fc fragment of IgG, low affinity IIIa, receptor<br>(CD16a)         |
| 2214   | FCGR3A   |                                                                                                          |
| 5033   | P4HA1    | procollagen-proline, 2-oxoglutarate 4-<br>dioxygenase (proline 4-hydroxylase), alpha<br>polypeptide I    |
| 51155  | HN1      | hematological and neurological expressed 1                                                               |

|        |           |                                                                                                                   |
|--------|-----------|-------------------------------------------------------------------------------------------------------------------|
| 146923 | RUNDC1    | RUN domain containing 1                                                                                           |
| 57575  | PCDH10    | protocadherin 10                                                                                                  |
| 6171   | RPL41     | ribosomal protein L41                                                                                             |
| 9840   | KIAA0748  | KIAA0748                                                                                                          |
| 5354   | PLP1      | proteolipid protein 1 (Pelizaeus-Merzbacher disease, spastic paraplegia 2, uncomplicated)                         |
| 55719  | C10orf6   | chromosome 10 open reading frame 6                                                                                |
| 55614  | C20orf23  | chromosome 20 open reading frame 23                                                                               |
| 55612  | C20orf42  | chromosome 20 open reading frame 42                                                                               |
| 26035  | GLCE      | UDP-glucuronic acid epimerase                                                                                     |
| 83543  | C9orf58   | chromosome 9 open reading frame 58 pre-B-cell leukemia transcription factor interacting protein 1                 |
| 57326  | PBXIP1    | interacting protein 1                                                                                             |
| 84059  | GPR98     | G protein-coupled receptor 98                                                                                     |
| 10174  | SORBS3    | sorbin and SH3 domain containing 3                                                                                |
| 10174  | SORBS3    | sorbin and SH3 domain containing 3 ADP-ribosylation factor interacting protein 1                                  |
| 27236  | ARFIP1    | (arfaptin 1)                                                                                                      |
| 10607  | TBL3      | transducin (beta)-like 3                                                                                          |
| 55727  | BTBD7     | BTB (POZ) domain containing 7                                                                                     |
| 22881  | ANKRD6    | ankyrin repeat domain 6                                                                                           |
| 79718  | TBL1XR1   | transducin (beta)-like 1X-linked receptor 1 complement component 1, q subcomponent, C chain                       |
| 714    | C1QC      | C chain                                                                                                           |
| 761    | CA3       | carbonic anhydrase III, muscle specific                                                                           |
| 83719  | YPEL3     | yippee-like 3 (Drosophila)                                                                                        |
| 1522   | CTSZ      | cathepsin Z                                                                                                       |
| 51373  | MRPS17    | mitochondrial ribosomal protein S17                                                                               |
| 4846   | NOS3      | nitric oxide synthase 3 (endothelial cell)                                                                        |
| 590    | BCHE      | butyrylcholinesterase                                                                                             |
| 84498  | FAM120B   | family with sequence similarity 120B                                                                              |
| 9984   | THOC1     | THO complex 1                                                                                                     |
| 6498   | SKIL      | SKI-like                                                                                                          |
| 79939  | SLC35E1   | solute carrier family 35, member E1                                                                               |
| 10454  | MAP3K7IP1 | mitogen-activated protein kinase kinase 7 interacting protein 1                                                   |
| 10966  | RAB40B    | RAB40B, member RAS oncogene family                                                                                |
| 7113   | TMPRSS2   | transmembrane protease, serine 2 retinoic acid receptor responder (tazarotene induced) 3                          |
| 5920   | RARRES3   | protein phosphatase 2 (formerly 2A), regulatory subunit B'', alpha kelch repeat and BTB (POZ) domain containing 4 |
| 5523   | PPP2R3A   | protein phosphatase 2 (formerly 2A), regulatory subunit B'', alpha kelch repeat and BTB (POZ) domain containing 4 |
| 55709  | KBTD4     | containing 4                                                                                                      |
| 9985   | REC8L1    | REC8-like 1 (yeast)                                                                                               |
| 1300   | COL10A1   | collagen, type X, alpha 1(Schmid metaphyseal chondrodysplasia)                                                    |
| 51136  | LOC51136  | PTD016 protein                                                                                                    |
| 58533  | SNX6      | sorting nexin 6                                                                                                   |

|       |           |                                                                                                                                             |
|-------|-----------|---------------------------------------------------------------------------------------------------------------------------------------------|
| 29997 | GLTSCR2   | glioma tumor suppressor candidate region gene 2                                                                                             |
| 23586 | DDX58     | DEAD (Asp-Glu-Ala-Asp) box polypeptide 58                                                                                                   |
| 57701 | KIAA1602  | KIAA1602<br>deoxynucleotidyltransferase, terminal,<br>interacting protein 2                                                                 |
| 30836 | DNTTIP2   | hydroxysteroid (11-beta) dehydrogenase 2                                                                                                    |
| 3291  | HSD11B2   | transmembrane protein 43                                                                                                                    |
| 79188 | TMEM43    | lactate dehydrogenase A                                                                                                                     |
| 3939  | LDHA      | glioblastoma amplified sequence                                                                                                             |
| 2631  | GBAS      | OCIA domain containing 1                                                                                                                    |
| 54940 | OCIAD1    | pumilio homolog 1 (Drosophila)                                                                                                              |
| 9698  | PUM1      |                                                                                                                                             |
| 4688  | NCF2      | neutrophil cytosolic factor 2 (65kDa, chronic<br>granulomatous disease, autosomal 2)<br>FBJ murine osteosarcoma viral oncogene<br>homolog B |
| 2354  | FOSB      | trafficking protein particle complex 3                                                                                                      |
| 27095 | TRAPPC3   | pellino homolog 1 (Drosophila)                                                                                                              |
| 57162 | PELI1     | RAB11 family interacting protein 3 (class II)                                                                                               |
| 9727  | RAB11FIP3 | KIAA1822-like                                                                                                                               |
| 79802 | KIAA1822L | tyrosine 3-monooxygenase/tryptophan 5-<br>monooxygenase activation protein, eta<br>polypeptide                                              |
| 7533  | YWHAH     | KIAA1794                                                                                                                                    |
| 55215 | KIAA1794  | grainyhead-like 1 (Drosophila)                                                                                                              |
| 29841 | GRHL1     | chromosome 1 open reading frame 21                                                                                                          |
| 81563 | C1orf21   | transmembrane protein 165                                                                                                                   |
| 55858 | TMEM165   |                                                                                                                                             |
| 79648 | MCPH1     | microcephaly, primary autosomal recessive 1                                                                                                 |
